# Supplementary material
Source: PubMed Central journal article supplement (PMC2917991)

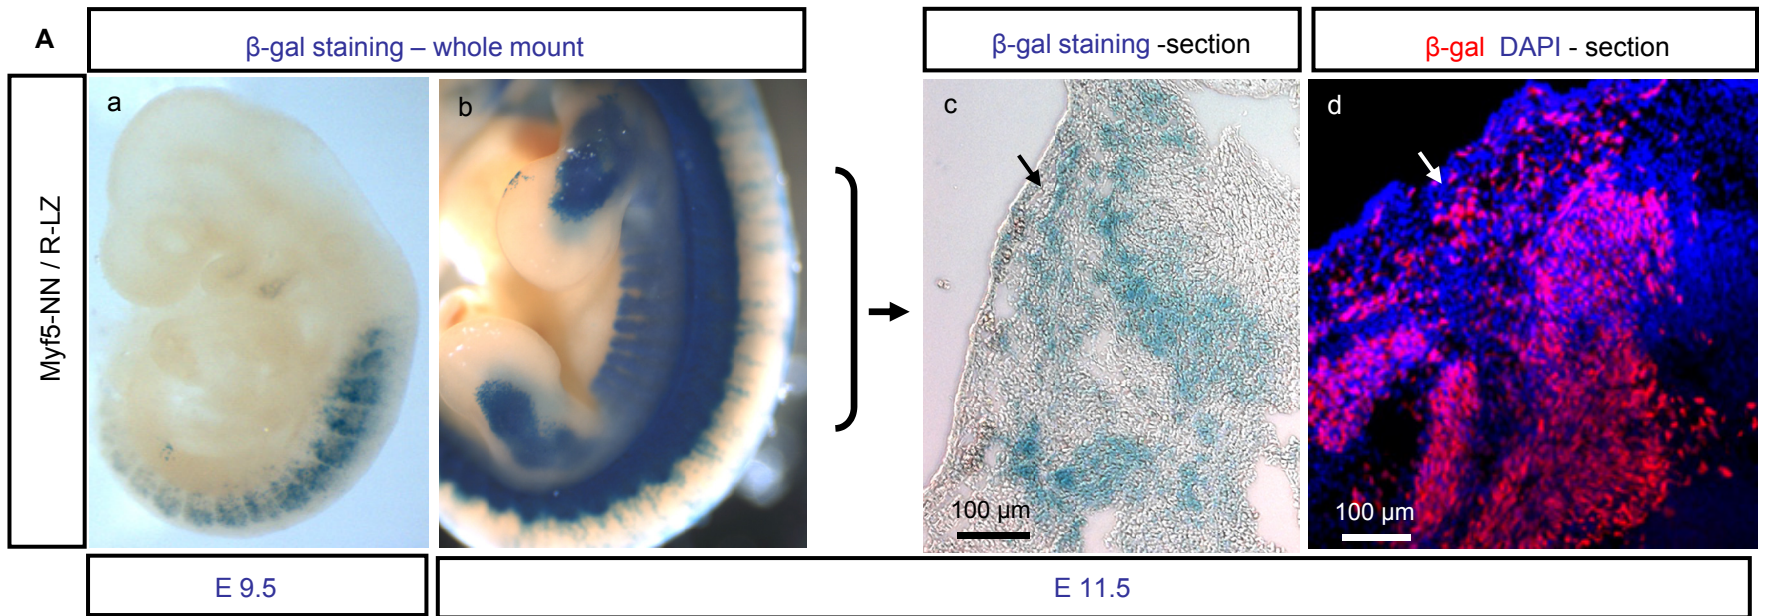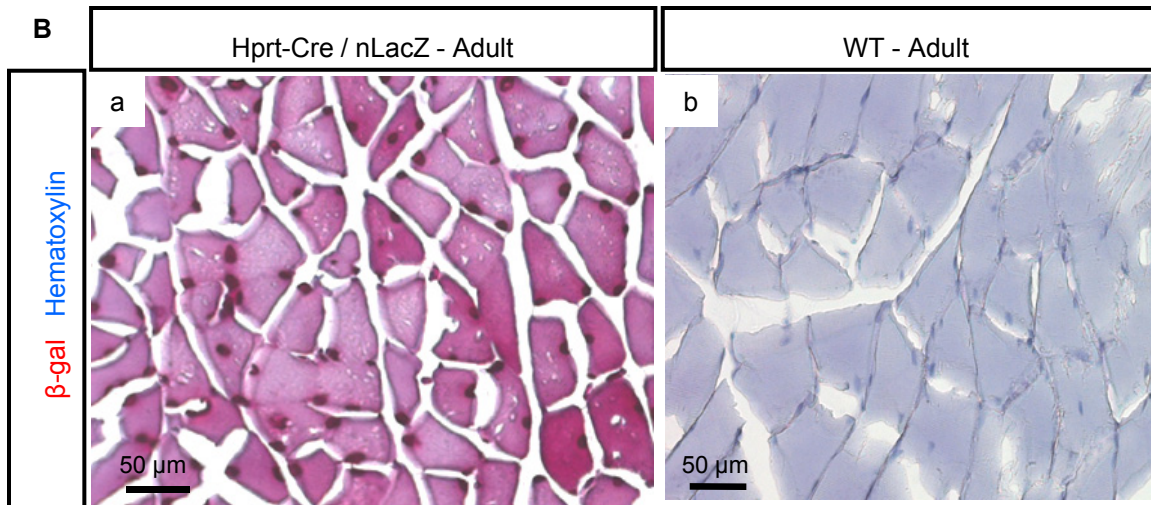

Supplement: NIHMS128689-supplement-Supplementary_Figure_1.pdf [file NIHMS128689-supplement-Supplementary_Figure_1.pdf]

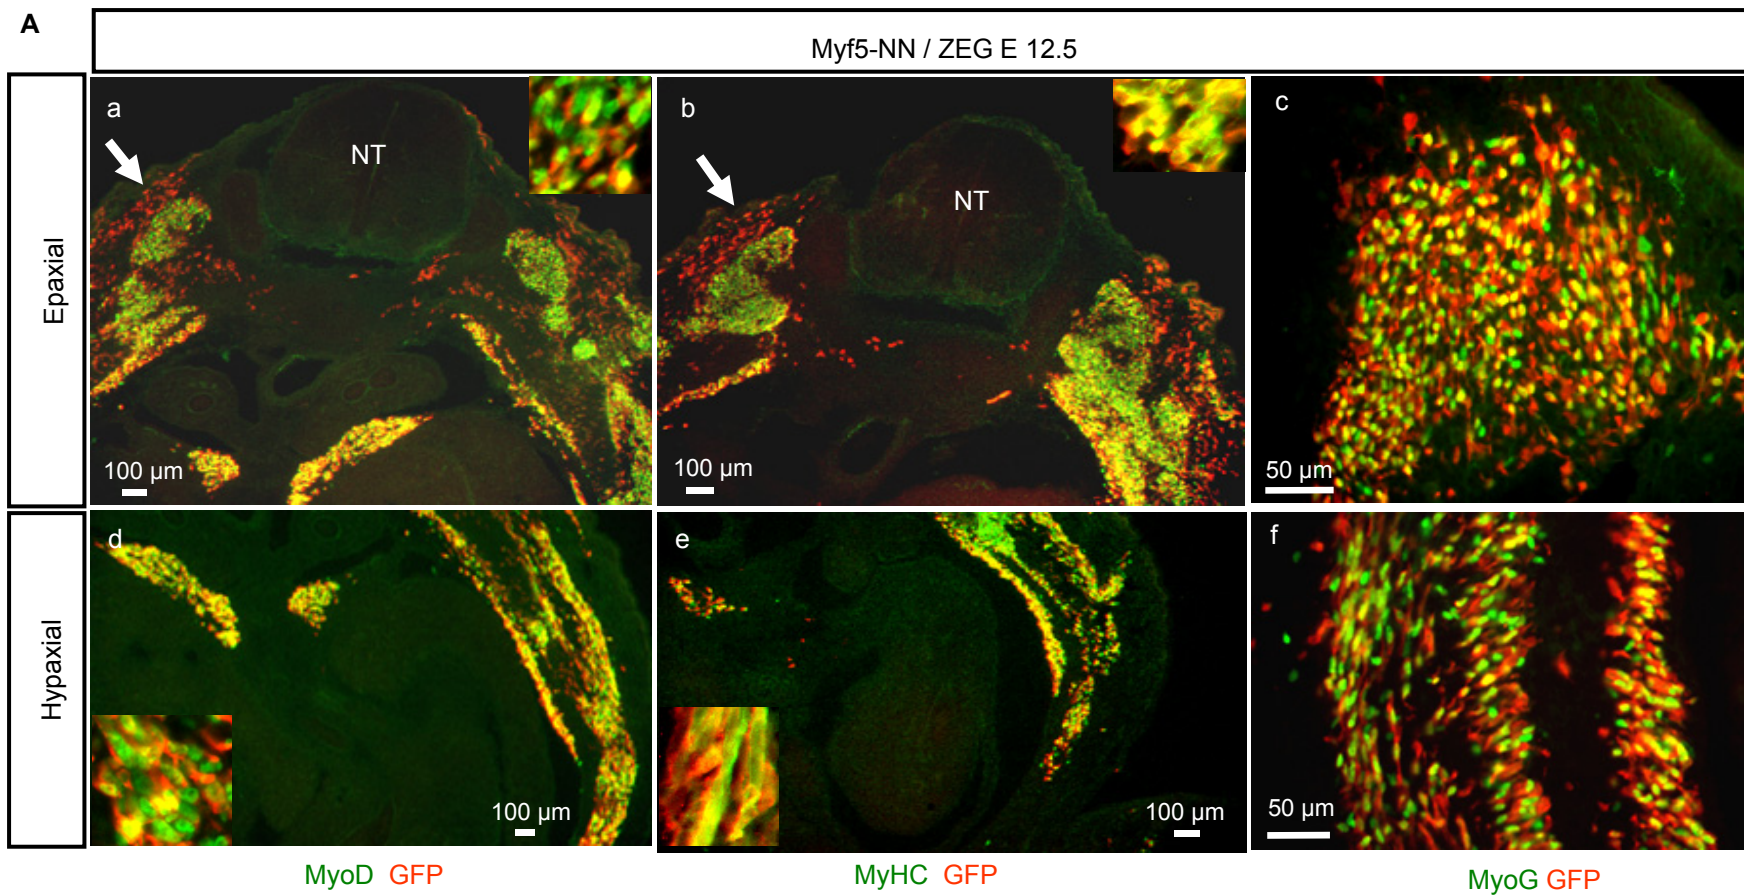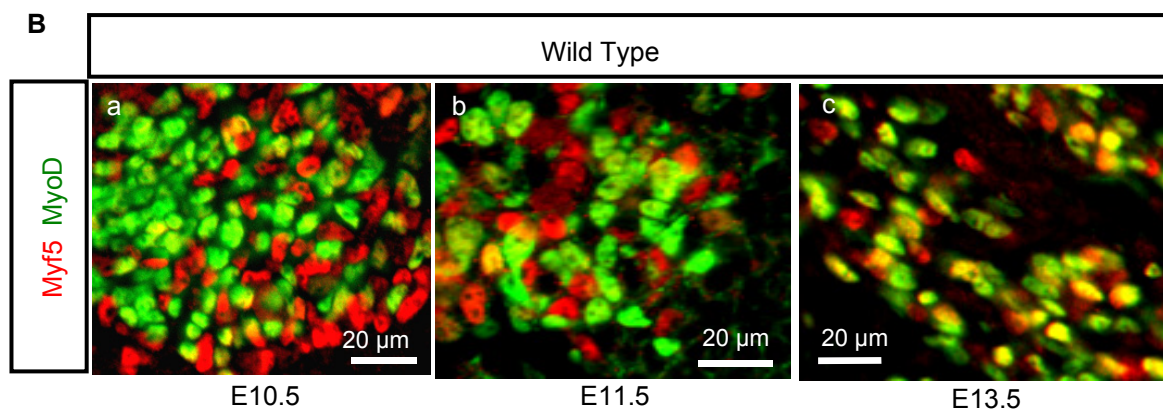

Supplement: NIHMS128689-supplement-Supplementary_Figure_2.pdf [file NIHMS128689-supplement-Supplementary_Figure_2.pdf]

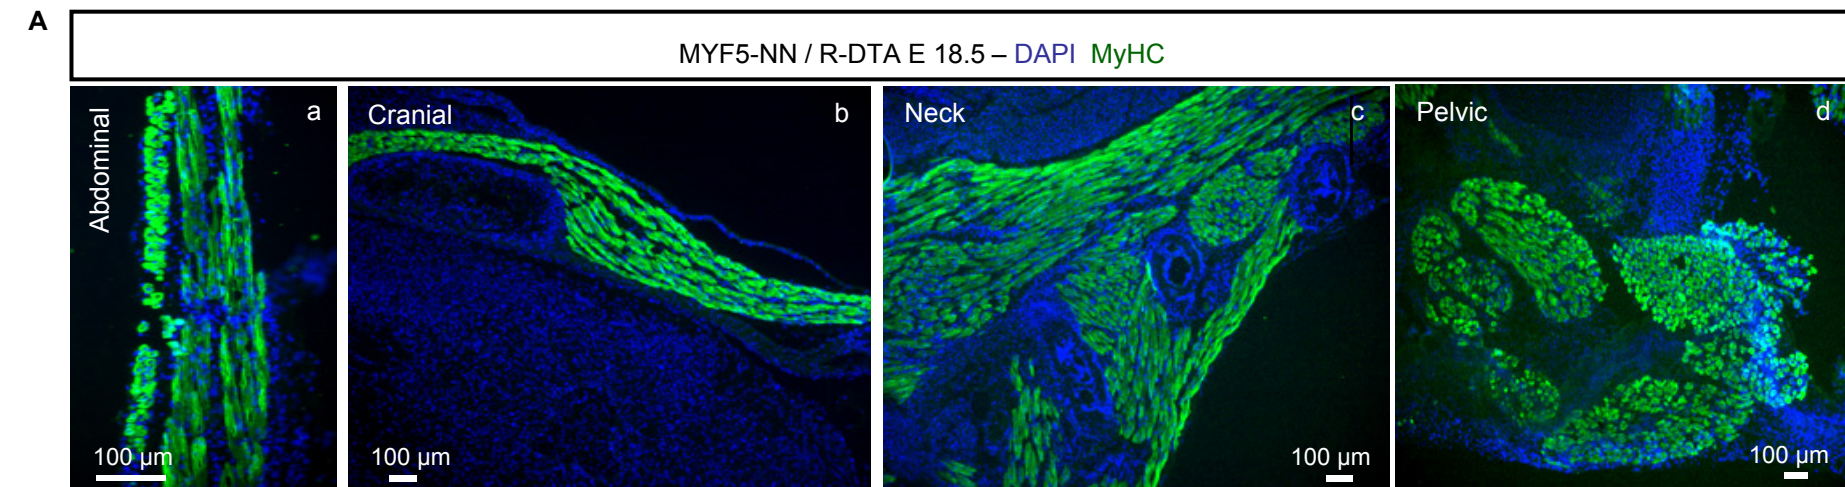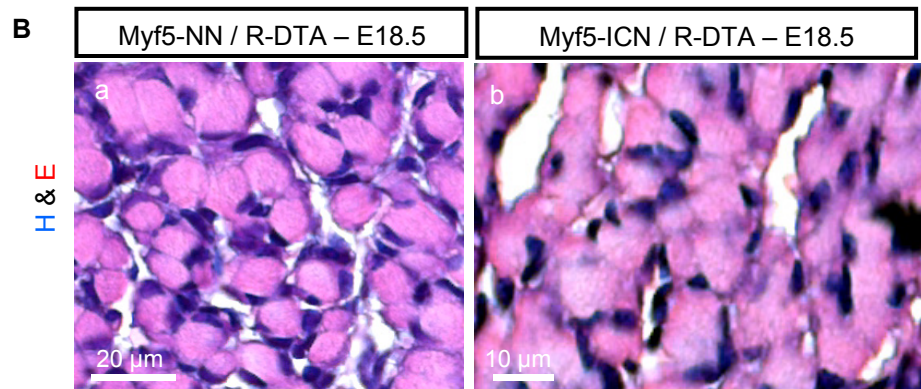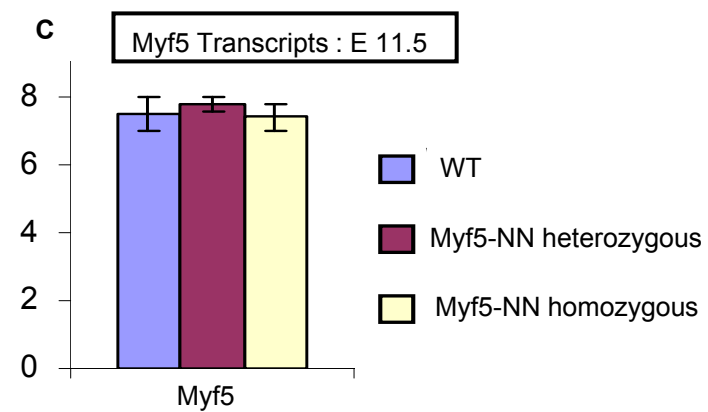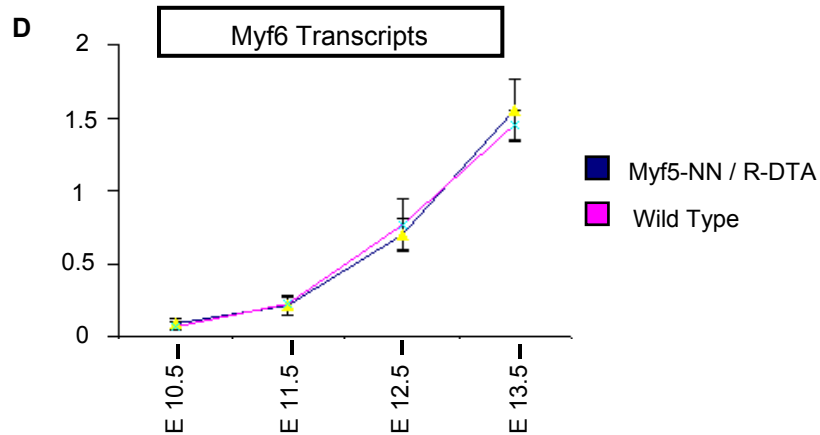

Supplement: NIHMS128689-supplement-Supplementary_Figure_3.pdf [file NIHMS128689-supplement-Supplementary_Figure_3.pdf]

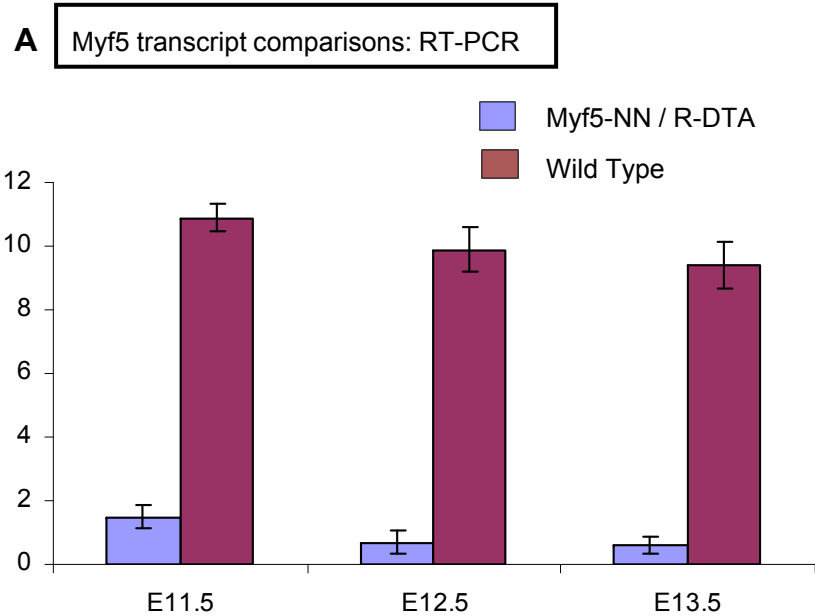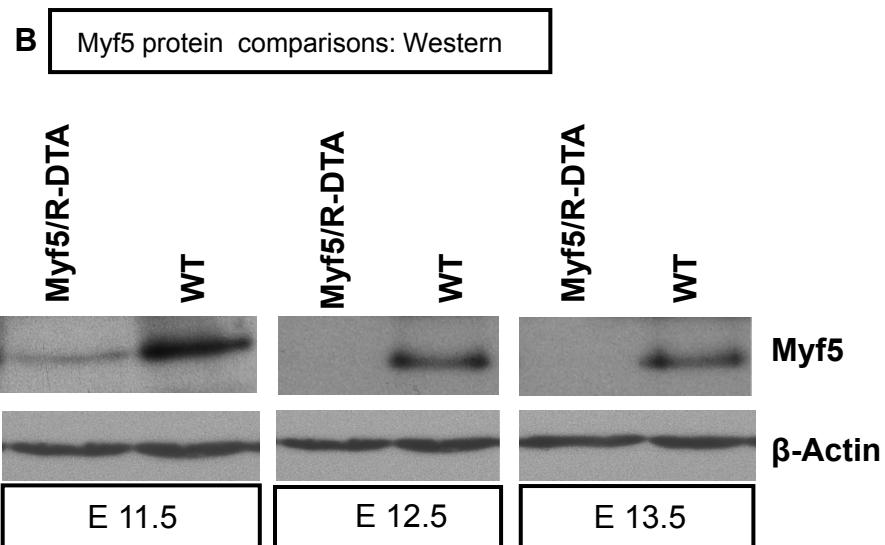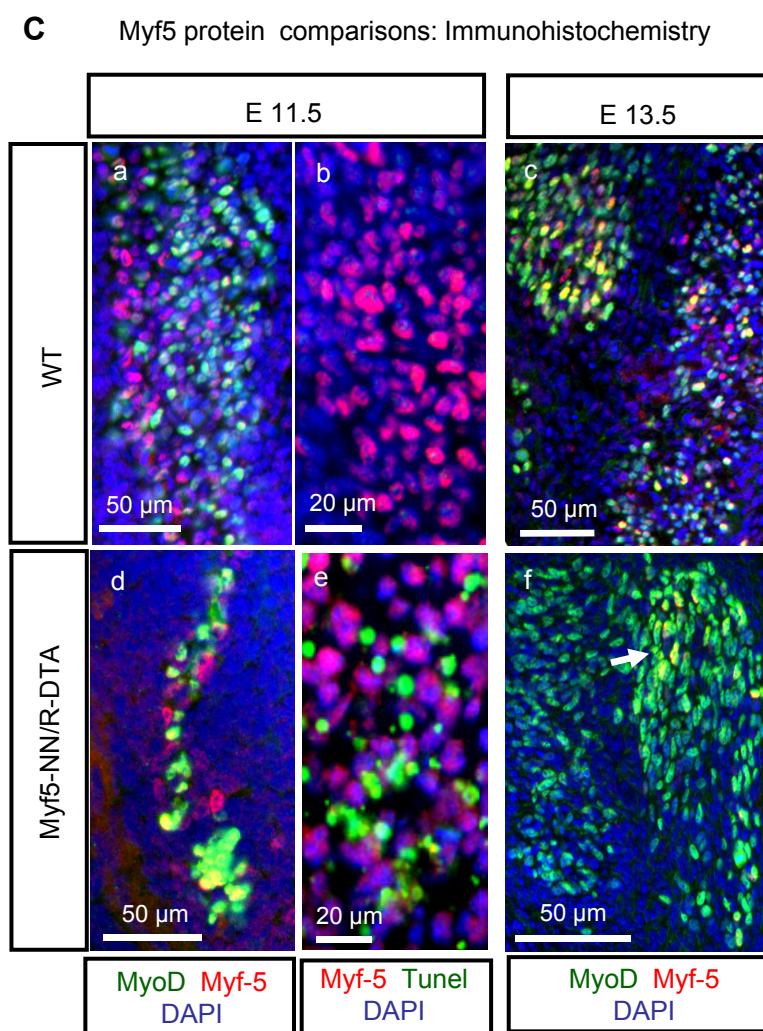

Supplement: NIHMS128689-supplement-Supplementary_Figure_4__1_.pdf [file NIHMS128689-supplement-Supplementary_Figure_4__1_.pdf]

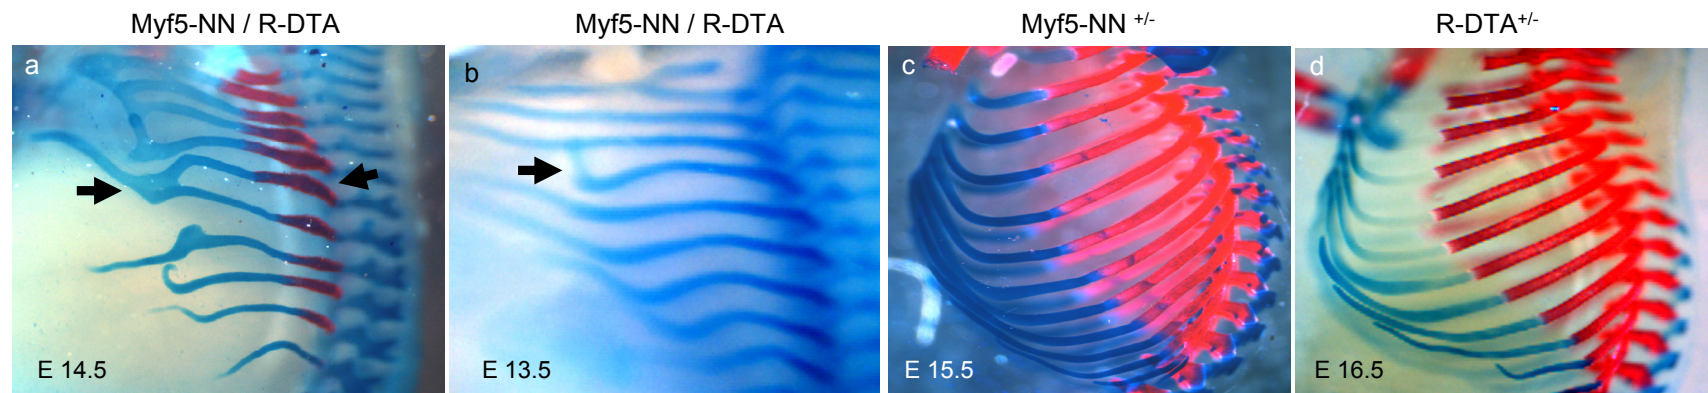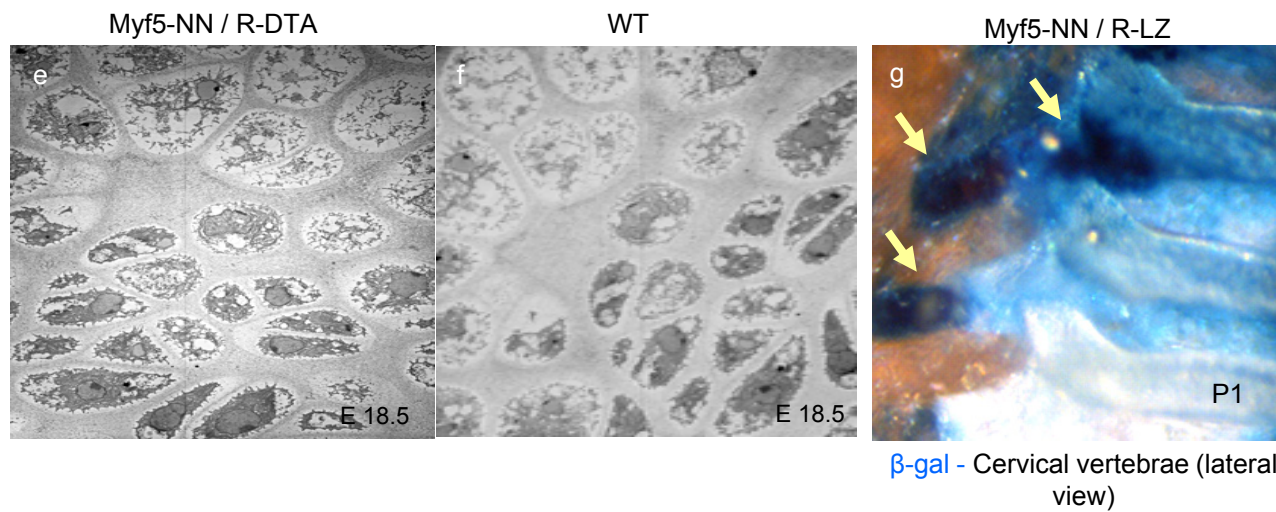

Supplement: NIHMS128689-supplement-Supplementary_Figure_5.pdf [file NIHMS128689-supplement-Supplementary_Figure_5.pdf]
